# Supplementary material for: Biomimicry Industry and Patent Trends
Source: MDPI journal article supplement (doi:10.3390/biomimetics8030288), 2023-07-03
Supplement: s1 [file s1]

### The status of domestic and foreign patent applications in major countries

| Country                                                                    | KIPO      |     | USPTO     |     | JPO       |    | EPO          |    |
|----------------------------------------------------------------------------|-----------|-----|-----------|-----|-----------|----|--------------|----|
| <b>Total</b>                                                               | 287       |     | 472       |     | 88        |    | 93           |    |
| <b>Domestic/<br/>Foreigner</b>                                             | Domestic  | 254 | Domestic  | 334 | Domestic  | 42 | European     | 32 |
|                                                                            | Foreigner | 33  | Foreigner | 138 | Foreigner | 46 | non-European | 61 |
| <b>Numbers of<br/>applications<br/>by country<br/>among<br/>foreigners</b> | US        | 15  | CN        | 29  | US        | 28 | US           | 47 |
|                                                                            | DE        | 3   | KR        | 23  | KR        | 4  | KR           | 4  |
|                                                                            | DK        | 2   | TW        | 12  | CN        | 3  | JP           | 3  |
|                                                                            | JP        | 2   | JP        | 9   | SG        | 3  | CN           | 3  |
|                                                                            | CN        | 2   | DE        | 8   | DE        | 2  | TW           | 2  |
|                                                                            | Other     | 9   | Other     | 57  | Other     | 6  | Other        | 2  |
