# Supplementary material for: Biomimicry Industry and Patent Trends
Source: MDPI journal article supplement (doi:10.3390/biomimetics8030288), 2023-07-03
Supplement: s1 [file s1]

| Country code | Patent kind code | Application number | Application date | Registration number | Registration date |
|--------------|------------------|--------------------|------------------|---------------------|-------------------|
| KR           | A                | 10-2013-0157260    | 2013-12-17       |                     |                   |
| KR           | B1               | 10-2001-0071488    | 2001-11-16       | 10-0451984          | 2004-09-30        |
| KR           | A                | 10-2002-0018111    | 2002-03-30       |                     |                   |
| KR           | B1               | 10-2002-0055578    | 2002-09-13       | 10-0476462          | 2005-03-04        |
| KR           | B1               | 10-2003-0087242    | 2003-12-03       | 10-0540180          | 2005-12-23        |
| KR           | A                | 10-2004-0000211    | 2004-01-05       |                     |                   |
| KR           | B1               | 10-2004-0020122    | 2004-03-24       | 10-0515031          | 2005-09-07        |
| KR           | A                | 10-2006-7016269    | 2005-01-12       |                     |                   |
| KR           | B1               | 10-2005-0022169    | 2005-03-17       | 10-0678987          | 2007-01-30        |
| KR           | B1               | 10-2005-0133749    | 2005-12-29       | 10-0746878          | 2007-08-01        |
| KR           | B1               | 10-2007-0028280    | 2007-03-22       | 10-1237960          | 2013-02-21        |
| KR           | A                | 10-2007-0088590    | 2007-08-31       |                     |                   |
| KR           | B1               | 10-2007-0088588    | 2007-08-31       | 10-0881287          | 2009-01-23        |
| KR           | B1               | 10-2007-0088589    | 2007-08-31       | 10-0881288          | 2009-01-23        |
| KR           | B1               | 10-2008-0034300    | 2008-04-14       | 10-1049220          | 2011-07-07        |
| KR           | B1               | 10-2008-0040865    | 2008-04-30       | 10-0928330          | 2009-11-17        |
| KR           | B1               | 10-2008-0044391    | 2008-05-14       | 10-1457147          | 2014-10-27        |
| KR           | B1               | 10-2008-0067082    | 2008-07-10       | 10-0951915          | 2010-04-01        |
| KR           | B1               | 10-2008-0076860    | 2008-08-06       | 10-1012998          | 2011-01-27        |
| KR           | B1               | 10-2008-0095352    | 2008-09-29       | 10-1006547          | 2010-12-30        |
| KR           | B1               | 10-2008-0108929    | 2008-11-04       | 10-1073224          | 2011-10-06        |
| KR           | B1               | 10-2008-0114805    | 2008-11-18       | 10-1059481          | 2011-08-19        |
| KR           | B1               | 10-2008-0120670    | 2008-12-01       | 10-0976866          | 2010-08-12        |
| KR           | B1               | 10-2008-0127249    | 2008-12-15       | 10-0970265          | 2010-07-07        |
| KR           | B1               | 10-2009-0001673    | 2009-01-08       | 10-1139354          | 2012-04-17        |
| KR           | A                | 10-2009-0003559    | 2009-01-16       |                     |                   |
| KR           | A                | 10-2010-7019404    | 2009-01-29       |                     |                   |
| KR           | B1               | 10-2009-0122838    | 2009-12-11       | 10-1200799          | 2012-11-07        |
| KR           | A                | 10-2009-0011280    | 2009-02-12       |                     |                   |
| KR           | B1               | 10-2009-0090575    | 2009-09-24       | 10-1197117          | 2012-10-29        |
| KR           | B1               | 10-2009-0092295    | 2009-09-29       | 10-1094443          | 2011-12-08        |
| KR           | A                | 10-2010-0032050    | 2010-04-07       |                     |                   |
| KR           | B1               | 10-2010-0035175    | 2010-04-16       | 10-1182287          | 2012-09-06        |
| KR           | B1               | 10-2010-0057302    | 2010-06-16       | 10-1198076          | 2012-10-31        |
| KR           | B1               | 10-2010-0074714    | 2010-08-02       | 10-1221558          | 2013-01-07        |
| KR           | B1               | 10-2010-0095580    | 2010-09-30       | 10-1217765          | 2012-12-26        |
| KR           | B1               | 10-2010-0107109    | 2010-10-29       | 10-1769553          | 2017-08-11        |
| KR           | B1               | 10-2010-0114566    | 2010-11-17       | 10-1761846          | 2017-07-20        |
| KR           | B1               | 10-2010-0117452    | 2010-11-24       | 10-1258755          | 2013-04-22        |
| KR           | A                | 10-2012-7018324    | 2010-12-15       |                     |                   |
| KR           | B1               | 10-2010-0137829    | 2010-12-29       | 10-1685646          | 2016-12-06        |
| KR           | B1               | 10-2011-0020198    | 2011-03-08       | 10-1276706          | 2013-06-13        |
| KR           | B1               | 10-2011-0031026    | 2011-04-05       | 10-1377743          | 2014-03-17        |
| KR           | B1               | 10-2011-0034266    | 2011-04-13       | 10-1317426          | 2013-10-02        |
| KR           | B1               | 10-2011-0034256    | 2011-04-13       | 10-1254112          | 2013-04-08        |
| KR           | A                | 10-2011-0086106    | 2011-08-27       |                     |                   |
| KR           | B1               | 10-2011-0098165    | 2011-09-28       | 10-1281255          | 2013-06-26        |
| KR           | A                | 10-2011-0122416    | 2011-11-22       |                     |                   |
| KR           | B1               | 10-2011-0127525    | 2011-12-01       | 10-1327889          | 2013-11-05        |
| KR           | A                | 10-2012-0002163    | 2012-01-06       |                     |                   |
| KR           | B1               | 10-2012-0026709    | 2012-03-15       | 10-1357301          | 2014-01-21        |
| KR           | B1               | 10-2012-0043299    | 2012-04-25       | 10-1374004          | 2014-03-06        |
| KR           | A                | 10-2012-0050126    | 2012-05-11       |                     |                   |
| KR           | A                | 10-2012-0054202    | 2012-05-22       |                     |                   |
| KR           | B1               | 10-2012-0055809    | 2012-05-25       | 10-1388713          | 2014-04-17        |
| KR           | B1               | 10-2014-7003115    | 2012-07-09       | 10-1576117          | 2015-12-03        |
| KR           | B1               | 10-2012-0123818    | 2012-11-02       | 10-1425510          | 2014-07-25        |
| KR           | B1               | 10-2012-0126679    | 2012-11-09       | 10-1363873          | 2014-02-11        |
| KR           | B1               | 10-2012-0128817    | 2012-11-14       | 10-1361491          | 2014-02-05        |
| KR           | B1               | 10-2012-0129257    | 2012-11-15       | 10-1402735          | 2014-05-27        |
| KR           | B1               | 10-2012-0129293    | 2012-11-15       | 10-1400095          | 2014-05-21        |

|    |    |                 |            |            |            |
|----|----|-----------------|------------|------------|------------|
| KR | B1 | 10-2012-0136314 | 2012-11-28 | 10-1448870 | 2014-10-01 |
| KR | A  | 10-2013-0007737 | 2013-01-23 |            |            |
| KR | B1 | 10-2013-0015693 | 2013-02-14 | 10-1510876 | 2015-04-03 |
| KR | B1 | 10-2013-0036144 | 2013-04-03 | 10-1477687 | 2014-12-23 |
| KR | B1 | 10-2013-0066087 | 2013-06-10 | 10-1295940 | 2013-08-06 |
| KR | B1 | 10-2013-0090368 | 2013-07-30 | 10-1488247 | 2015-01-26 |
| KR | A  | 10-2001-0010629 | 2001-02-23 |            |            |
| KR | B1 | 10-2001-0071488 | 2001-11-16 | 10-0451984 | 2004-09-30 |
| KR | A  | 10-2002-0018111 | 2002-03-30 |            |            |
| KR | B1 | 10-2005-0133749 | 2005-12-29 | 10-0746878 | 2007-08-01 |
| KR | B1 | 10-2002-0055578 | 2002-09-13 | 10-0476462 | 2005-03-04 |
| KR | B1 | 10-2003-0087242 | 2003-12-03 | 10-0540180 | 2005-12-23 |
| KR | A  | 10-2004-0000211 | 2004-01-05 |            |            |
| KR | B1 | 10-2004-0020122 | 2004-03-24 | 10-0515031 | 2005-09-07 |
| KR | A  | 10-2006-7016269 | 2005-01-12 |            |            |
| KR | B1 | 10-2005-0022169 | 2005-03-17 | 10-0678987 | 2007-01-30 |
| KR | B1 | 10-2007-0028280 | 2007-03-22 | 10-1237960 | 2013-02-21 |
| KR | A  | 10-2007-0088590 | 2007-08-31 |            |            |
| KR | B1 | 10-2007-0088588 | 2007-08-31 | 10-0881287 | 2009-01-23 |
| KR | B1 | 10-2007-0088589 | 2007-08-31 | 10-0881288 | 2009-01-23 |
| KR | B1 | 10-2008-0034300 | 2008-04-14 | 10-1049220 | 2011-07-07 |
| KR | B1 | 10-2008-0040865 | 2008-04-30 | 10-0928330 | 2009-11-17 |
| KR | B1 | 10-2008-0044391 | 2008-05-14 | 10-1457147 | 2014-10-27 |
| KR | B1 | 10-2008-0067082 | 2008-07-10 | 10-0951915 | 2010-04-01 |
| KR | B1 | 10-2008-0076860 | 2008-08-06 | 10-1012998 | 2011-01-27 |
| KR | B1 | 10-2008-0095352 | 2008-09-29 | 10-1006547 | 2010-12-30 |
| KR | B1 | 10-2008-0108929 | 2008-11-04 | 10-1073224 | 2011-10-06 |
| KR | B1 | 10-2008-0114805 | 2008-11-18 | 10-1059481 | 2011-08-19 |
| KR | B1 | 10-2008-0120670 | 2008-12-01 | 10-0976866 | 2010-08-12 |
| KR | B1 | 10-2008-0127249 | 2008-12-15 | 10-0970265 | 2010-07-07 |
| KR | B1 | 10-2009-0001673 | 2009-01-08 | 10-1139354 | 2012-04-17 |
| KR | A  | 10-2009-0003559 | 2009-01-16 |            |            |
| KR | A  | 10-2010-7019404 | 2009-01-29 |            |            |
| KR | A  | 10-2009-0011280 | 2009-02-12 |            |            |
| KR | B1 | 10-2009-0092295 | 2009-09-29 | 10-1094443 | 2011-12-08 |
| KR | B1 | 10-2009-0090575 | 2009-09-24 | 10-1197117 | 2012-10-29 |
| KR | B1 | 10-2010-0074714 | 2010-08-02 | 10-1221558 | 2013-01-07 |
| KR | B1 | 10-2010-0095580 | 2010-09-30 | 10-1217765 | 2012-12-26 |
| KR | B1 | 10-2010-0107109 | 2010-10-29 | 10-1769553 | 2017-08-11 |
| KR | B1 | 10-2010-0114566 | 2010-11-17 | 10-1761846 | 2017-07-20 |
| KR | B1 | 10-2010-0117452 | 2010-11-24 | 10-1258755 | 2013-04-22 |
| KR | A  | 10-2012-7018324 | 2010-12-15 |            |            |
| KR | B1 | 10-2010-0137829 | 2010-12-29 | 10-1685646 | 2016-12-06 |
| KR | B1 | 10-2011-0020198 | 2011-03-08 | 10-1276706 | 2013-06-13 |
| KR | B1 | 10-2011-0031026 | 2011-04-05 | 10-1377743 | 2014-03-17 |
| KR | B1 | 10-2011-0034266 | 2011-04-13 | 10-1317426 | 2013-10-02 |
| KR | B1 | 10-2011-0034256 | 2011-04-13 | 10-1254112 | 2013-04-08 |
| KR | A  | 10-2011-0086106 | 2011-08-27 |            |            |
| KR | B1 | 10-2011-0098165 | 2011-09-28 | 10-1281255 | 2013-06-26 |
| KR | A  | 10-2011-0122416 | 2011-11-22 |            |            |
| KR | B1 | 10-2011-0127525 | 2011-12-01 | 10-1327889 | 2013-11-05 |
| KR | A  | 10-2012-0002163 | 2012-01-06 |            |            |
| KR | B1 | 10-2009-0122838 | 2009-12-11 | 10-1200799 | 2012-11-07 |
| KR | A  | 10-2010-0032050 | 2010-04-07 |            |            |
| KR | B1 | 10-2010-0035175 | 2010-04-16 | 10-1182287 | 2012-09-06 |
| KR | B1 | 10-2010-0057302 | 2010-06-16 | 10-1198076 | 2012-10-31 |
| KR | B1 | 10-2012-0026709 | 2012-03-15 | 10-1357301 | 2014-01-21 |
| KR | B1 | 10-2012-0043299 | 2012-04-25 | 10-1374004 | 2014-03-06 |
| KR | A  | 10-2012-0050126 | 2012-05-11 |            |            |
| KR | A  | 10-2012-0054202 | 2012-05-22 |            |            |
| KR | B1 | 10-2012-0055809 | 2012-05-25 | 10-1388713 | 2014-04-17 |
| KR | B1 | 10-2014-7003115 | 2012-07-09 | 10-1576117 | 2015-12-03 |

|    |    |                 |            |            |            |
|----|----|-----------------|------------|------------|------------|
| KR | B1 | 10-2012-0123818 | 2012-11-02 | 10-1425510 | 2014-07-25 |
| KR | B1 | 10-2012-0126679 | 2012-11-09 | 10-1363873 | 2014-02-11 |
| KR | B1 | 10-2012-0128817 | 2012-11-14 | 10-1361491 | 2014-02-05 |
| KR | B1 | 10-2012-0129257 | 2012-11-15 | 10-1402735 | 2014-05-27 |
| KR | B1 | 10-2012-0129293 | 2012-11-15 | 10-1400095 | 2014-05-21 |
| KR | B1 | 10-2012-0136314 | 2012-11-28 | 10-1448870 | 2014-10-01 |
| KR | A  | 10-2013-0007737 | 2013-01-23 |            |            |
| KR | B1 | 10-2013-0015693 | 2013-02-14 | 10-1510876 | 2015-04-03 |
| KR | B1 | 10-2013-0036144 | 2013-04-03 | 10-1477687 | 2014-12-23 |
| KR | B1 | 10-2013-0066087 | 2013-06-10 | 10-1295940 | 2013-08-06 |
| KR | B1 | 10-2013-0090368 | 2013-07-30 | 10-1488247 | 2015-01-26 |
| KR | B1 | 10-2013-0164154 | 2013-12-26 | 10-1453221 | 2014-10-14 |
| KR | B1 | 10-2014-0006079 | 2014-01-17 | 10-1579547 | 2015-12-16 |
| KR | B1 | 10-2014-0040662 | 2014-04-04 | 10-1554490 | 2015-09-15 |
| KR | B1 | 10-2014-0063456 | 2014-05-27 | 10-1487839 | 2015-01-23 |
| KR | B1 | 10-2014-0070928 | 2014-06-11 | 10-1605247 | 2016-03-15 |
| KR | B1 | 10-2014-0102601 | 2014-08-08 | 10-1484961 | 2015-01-15 |
| KR | B1 | 10-2014-0129884 | 2014-09-29 | 10-1608039 | 2016-03-25 |
| KR | B1 | 10-2014-0139188 | 2014-10-15 | 10-1665191 | 2016-10-05 |
| KR | B1 | 10-2014-0164673 | 2014-11-24 | 10-1684380 | 2016-12-02 |
| KR | A  | 10-2016-7017198 | 2014-11-24 |            |            |
| KR | B1 | 10-2015-0023844 | 2015-02-17 | 10-1724820 | 2017-04-03 |
| KR | B1 | 10-2015-0030853 | 2015-03-05 | 10-1638340 | 2016-07-05 |
| KR | B1 | 10-2015-0035270 | 2015-03-13 | 10-1722503 | 2017-03-28 |
| KR | B1 | 10-2015-0042193 | 2015-03-26 | 10-1554528 | 2015-09-15 |
| KR | B1 | 10-2015-0048846 | 2015-04-07 | 10-2246902 | 2021-04-26 |
| KR | B1 | 10-2015-0065761 | 2015-05-12 | 10-1685916 | 2016-12-07 |
| KR | A  | 10-2015-0113799 | 2015-08-12 |            |            |
| KR | A  | 10-2015-0114798 | 2015-08-13 |            |            |
| KR | A  | 10-2015-0114806 | 2015-08-13 |            |            |
| KR | B1 | 10-2015-0129801 | 2015-09-14 | 10-1787196 | 2017-10-11 |
| KR | B1 | 10-2015-0139026 | 2015-10-02 | 10-1744721 | 2017-06-01 |
| KR | B1 | 10-2015-0149469 | 2015-10-27 | 10-1741802 | 2017-05-24 |
| KR | A  | 10-2015-0155857 | 2015-11-06 |            |            |
| KR | A  | 10-2015-0174672 | 2015-12-09 |            |            |
| KR | A  | 10-2018-7021531 | 2015-12-30 |            |            |
| KR | B1 | 10-2016-0001333 | 2016-01-06 | 10-1738883 | 2017-05-17 |
| KR | A  | 10-2017-7023126 | 2016-01-20 |            |            |
| KR | B1 | 10-2016-0013069 | 2016-02-02 | 10-1815227 | 2017-12-28 |
| KR | B1 | 10-2016-0021105 | 2016-02-23 | 10-1838534 | 2018-03-08 |
| KR | B1 | 10-2016-0062966 | 2016-05-23 | 10-1675335 | 2016-11-07 |
| KR | B1 | 10-2016-0051876 | 2016-04-28 | 10-1831613 | 2018-02-19 |
| KR | A  | 10-2018-7010129 | 2016-06-30 |            |            |
| KR | B1 | 10-2016-0106210 | 2016-08-22 | 10-1954410 | 2019-02-26 |
| KR | B1 | 10-2016-0130446 | 2016-10-10 | 10-1840621 | 2018-03-15 |
| KR | B1 | 10-2016-0170094 | 2016-12-14 | 10-1886930 | 2018-08-02 |
| KR | A  | 10-2017-0002398 | 2017-01-06 |            |            |
| KR | B1 | 10-2017-0006404 | 2017-01-13 | 10-1767867 | 2017-08-07 |
| KR | B1 | 10-2017-0014548 | 2017-02-01 | 10-1936492 | 2019-01-02 |
| KR | B1 | 10-2017-0021111 | 2017-02-16 | 10-1919906 | 2018-11-13 |
| KR | A  | 10-2017-0022044 | 2017-02-20 |            |            |
| KR | B1 | 10-2017-0027769 | 2017-03-03 | 10-1889484 | 2018-08-10 |
| KR | B1 | 10-2017-0046160 | 2017-04-10 | 10-1845822 | 2018-03-30 |
| KR | B1 | 10-2017-0074794 | 2017-06-14 | 10-1904663 | 2018-09-27 |
| KR | B1 | 10-2017-0074795 | 2017-06-14 | 10-1904664 | 2018-09-27 |
| KR | B1 | 10-2017-0086046 | 2017-07-06 | 10-1881288 | 2018-07-18 |
| KR | B1 | 10-2017-0088660 | 2017-07-12 | 10-1820632 | 2018-01-15 |
| KR | B1 | 10-2017-0090532 | 2017-07-17 | 10-2097449 | 2020-03-31 |
| KR | A  | 10-2017-0144933 | 2017-11-01 |            |            |
| KR | B1 | 10-2017-0148941 | 2017-11-09 | 10-2064915 | 2020-01-06 |
| KR | B1 | 10-2017-0152185 | 2017-11-15 | 10-2054339 | 2019-12-04 |
| KR | B1 | 10-2018-0011453 | 2018-01-30 | 10-2023035 | 2019-09-11 |

|    |    |                 |            |            |            |
|----|----|-----------------|------------|------------|------------|
| KR | B1 | 10-2018-0014250 | 2018-02-05 | 10-2015040 | 2019-08-21 |
| KR | B1 | 10-2018-0017847 | 2018-02-13 | 10-2073828 | 2020-01-30 |
| KR | B1 | 10-2018-0034358 | 2018-03-26 | 10-2054580 | 2019-12-04 |
| KR | A  | 10-2019-7035639 | 2018-05-02 |            |            |
| KR | B1 | 10-2018-0057997 | 2018-05-21 | 10-1882652 | 2018-07-20 |
| KR | B1 | 10-2018-0073279 | 2018-06-26 | 10-1958759 | 2019-03-11 |
| KR | B1 | 10-2018-0075172 | 2018-06-29 | 10-2182310 | 2020-11-18 |
| KR | B1 | 10-2018-0085197 | 2018-07-23 | 10-2071648 | 2020-01-22 |
| KR | B1 | 10-2018-0086354 | 2018-07-25 | 10-2271744 | 2021-06-25 |
| KR | B1 | 10-2018-0086997 | 2018-07-26 | 10-1931917 | 2018-12-17 |
| KR | B1 | 10-2018-0089350 | 2018-07-31 | 10-2076619 | 2020-02-06 |
| KR | A  | 10-2021-7007258 | 2018-08-27 |            |            |
| KR | B1 | 10-2018-0125914 | 2018-10-22 | 10-2080609 | 2020-02-18 |
| KR | A  | 10-2018-0137910 | 2018-11-12 |            |            |
| KR | B1 | 10-2018-0148384 | 2018-11-27 | 10-2174498 | 2020-10-29 |
| KR | B1 | 10-2018-0165234 | 2018-12-19 | 10-2154907 | 2020-09-04 |
| KR | A  | 10-2018-0169172 | 2018-12-26 |            |            |
| KR | B1 | 10-2018-0173654 | 2018-12-31 | 10-2289463 | 2021-08-06 |
| KR | B1 | 10-2019-0005285 | 2019-01-15 | 10-2186049 | 2020-11-27 |
| KR | B1 | 10-2019-0005286 | 2019-01-15 | 10-2182067 | 2020-11-17 |
| KR | A  | 10-2019-0024957 | 2019-03-04 |            |            |
| KR | B1 | 10-2019-0033858 | 2019-03-25 | 10-2214475 | 2021-02-03 |
| KR | B1 | 10-2019-0042705 | 2019-04-11 | 10-2134474 | 2020-07-08 |
| KR | B1 | 10-2019-0068498 | 2019-06-11 | 10-2238394 | 2021-04-05 |
| KR | B1 | 10-2019-0072164 | 2019-06-18 | 10-2177754 | 2020-11-05 |
| KR | B1 | 10-2019-0082123 | 2019-07-08 | 10-2228882 | 2021-03-11 |
| KR | B1 | 10-2019-0089337 | 2019-07-24 | 10-2226435 | 2021-03-05 |
| KR | B1 | 10-2019-0104294 | 2019-08-26 | 10-2315515 | 2021-10-15 |
| KR | B1 | 10-2019-0108851 | 2019-09-03 | 10-2272831 | 2021-06-29 |
| KR | A  | 10-2019-0140511 | 2019-11-05 |            |            |
| KR | B1 | 10-2019-0162713 | 2019-12-09 | 10-2231057 | 2021-03-17 |
| KR | A  | 10-2020-0015182 | 2020-02-07 |            |            |
| KR | B1 | 10-2019-0177957 | 2019-12-30 | 10-2333892 | 2021-11-29 |
| KR | B1 | 10-2020-0036682 | 2020-03-26 | 10-2330922 | 2021-11-22 |
| KR | B1 | 10-2020-0040662 | 2020-04-03 | 10-2310625 | 2021-10-01 |
| KR | B1 | 10-2020-0045413 | 2020-04-14 | 10-2276602 | 2021-07-07 |
| KR | A  | 10-2020-0046299 | 2020-04-16 |            |            |
| KR | B1 | 10-2020-0051808 | 2020-04-28 | 10-2333694 | 2021-11-26 |
| KR | B1 | 10-2020-0056513 | 2020-05-12 | 10-2261754 | 2021-06-01 |
| KR | B1 | 10-2020-0057647 | 2020-05-14 | 10-2322217 | 2021-11-01 |
| KR | A  | 10-2020-0059730 | 2020-05-19 |            |            |
| KR | B1 | 10-2020-0088666 | 2020-07-17 | 10-2249949 | 2021-05-03 |
| KR | A  | 10-2021-0059847 | 2021-05-10 |            |            |
| KR | B1 | 10-2021-0066784 | 2021-05-25 | 10-2335485 | 2021-12-01 |
| US | B2 | 13/632604       | 2012-10-01 | 9463393    | 2016-10-11 |
| US | B2 | 13/720773       | 2012-12-19 | 8960595    | 2015-02-24 |
| US | B2 | 14/383038       | 2013-03-07 | 9938368    | 2018-04-10 |
| US | A1 | 13/917615       | 2013-06-13 |            |            |
| US | A  | 06/474996       | 1983-03-14 | 4527000    | 1985-07-02 |
| US | A  | 06/566516       | 1983-12-29 | 4544504    | 1985-10-01 |
| US | A  | 06/593058       | 1984-03-26 | 4548804    | 1985-10-22 |
| US | A  | 06/704442       | 1985-02-22 | 4722839    | 1988-02-02 |
| US | A  | 06/719881       | 1985-04-04 | 4861714    | 1989-08-29 |
| US | A  | 06/899301       | 1986-08-21 | 4752051    | 1988-06-21 |
| US | A  | 06/932088       | 1986-11-18 | 4863856    | 1989-09-05 |
| US | A  | 07/043956       | 1987-04-29 | 4755005    | 1988-07-05 |
| US | A  | 07/333831       | 1989-04-05 | 5100783    | 1992-03-31 |
| US | A  | 07/393656       | 1989-08-14 | 4997753    | 1991-03-05 |
| US | A  | 07/787579       | 1991-11-04 | 5465523    | 1995-11-14 |
| US | A  | 07/893232       | 1992-06-03 | 5519165    | 1996-05-21 |
| US | A  | 08/190390       | 1994-02-02 | 5497671    | 1996-03-12 |
| US | A  | 08/371289       | 1995-01-11 | 5495690    | 1996-03-05 |

|    |    |           |            |         |            |
|----|----|-----------|------------|---------|------------|
| US | A  | 08/563122 | 1995-11-29 | 5659994 | 1997-08-26 |
| US | A  | 08/562705 | 1996-04-10 | 5678730 | 1997-10-21 |
| US | A  | 08/856522 | 1997-05-14 | 5993406 | 1999-11-30 |
| US | A  | 08/889340 | 1997-07-08 | 5941007 | 1999-08-24 |
| US | A  | 08/893964 | 1997-07-16 | 5906525 | 1999-05-25 |
| US | A  | 08/932573 | 1997-09-19 | 5879387 | 1999-03-09 |
| US | A  | 08/964876 | 1997-11-05 | 6004444 | 1999-12-21 |
| US | A  | 09/076479 | 1998-05-12 | 6038804 | 2000-03-21 |
| US | B1 | 09/089602 | 1998-06-02 | 6260795 | 2001-07-17 |
| US | B1 | 09/291549 | 1999-04-14 | 6228248 | 2001-05-08 |
| US | B1 | 09/294737 | 1999-04-19 | 6379619 | 2002-04-30 |
| US | A  | 09/351361 | 1999-07-12 | 6053794 | 2000-04-25 |
| US | B1 | 09/435984 | 1999-11-08 | 6250330 | 2001-06-26 |
| US | B1 | 09/456275 | 1999-12-07 | 6331178 | 2001-12-18 |
| US | B1 | 09/627808 | 2000-07-28 | 6537575 | 2003-03-25 |
| US | B1 | 09/686608 | 2000-10-11 | 6564720 | 2003-05-20 |
| US | B2 | 09/846598 | 2001-04-30 | 6406101 | 2002-06-18 |
| US | B2 | 09/850364 | 2001-05-07 | 6547940 | 2003-04-15 |
| US | A1 | 09/877903 | 2001-06-08 |         |            |
| US | B1 | 09/891083 | 2001-06-25 | 6486334 | 2002-11-26 |
| US | A1 | 09/893720 | 2001-06-28 |         |            |
| US | B1 | 10/060142 | 2002-02-01 | 6893307 | 2005-05-17 |
| US | B2 | 10/358038 | 2003-02-03 | 8048155 | 2011-11-01 |
| US | B2 | 10/384039 | 2003-03-07 | 6799519 | 2004-10-05 |
| US | B2 | 10/411641 | 2003-04-11 | 7179356 | 2007-02-20 |
| US | B2 | 10/618949 | 2003-07-14 | 6915859 | 2005-07-12 |
| US | B2 | 10/627967 | 2003-07-28 | 7208089 | 2007-04-24 |
| US | A1 | 10/631982 | 2003-07-31 |         |            |
| US | B1 | 10/677206 | 2003-10-02 | 7137465 | 2006-11-21 |
| US | B1 | 10/781331 | 2004-02-17 | 7083492 | 2006-08-01 |
| US | B1 | 10/781172 | 2004-02-17 | 7070473 | 2006-07-04 |
| US | B2 | 10/810518 | 2004-03-26 | 7597885 | 2009-10-06 |
| US | B1 | 10/845910 | 2004-05-14 | 6997765 | 2006-02-14 |
| US | B2 | 10/898673 | 2004-07-23 | 7769487 | 2010-08-03 |
| US | B2 | 10/928073 | 2004-08-26 | 7007609 | 2006-03-07 |
| US | B1 | 10/936928 | 2004-09-09 | 7039292 | 2006-05-02 |
| US | A1 | 10/936066 | 2004-09-09 |         |            |
| US | A1 | 11/064607 | 2005-02-24 |         |            |
| US | B2 | 11/070723 | 2005-03-01 | 7314735 | 2008-01-01 |
| US | B1 | 11/085955 | 2005-03-22 | 7637795 | 2009-12-29 |
| US | A1 | 11/101002 | 2005-04-07 |         |            |
| US | B2 | 11/596148 | 2005-05-10 | 7540570 | 2009-06-02 |
| US | B1 | 11/234095 | 2005-09-26 | 7322226 | 2008-01-29 |
| US | B2 | 11/816684 | 2006-02-10 | 7857831 | 2010-12-28 |
| US | B1 | 11/369902 | 2006-03-07 | 7302892 | 2007-12-04 |
| US | A1 | 11/719880 | 2005-12-07 |         |            |
| US | B2 | 11/422388 | 2006-06-06 | 8162859 | 2012-04-24 |
| US | A1 | 11/559516 | 2006-11-14 |         |            |
| US | B2 | 11/732867 | 2007-04-04 | 7762362 | 2010-07-27 |
| US | A1 | 11/827827 | 2007-07-13 |         |            |
| US | A1 | 12/139828 | 2008-06-16 |         |            |
| US | A1 | 12/400043 | 2009-03-09 |         |            |
| US | A1 | 12/385654 | 2009-04-15 |         |            |
| US | B2 | 12/997272 | 2009-06-10 | 8545746 | 2013-10-01 |
| US | B2 | 12/742088 | 2008-11-05 | 8449620 | 2013-05-28 |
| US | B2 | 12/342583 | 2008-12-23 | 8382029 | 2013-02-26 |
| US | B2 | 12/981760 | 2010-12-30 | 8472762 | 2013-06-25 |
| US | B2 | 12/984947 | 2011-01-05 | 9042204 | 2015-05-26 |
| US | A1 | 13/165157 | 2011-06-21 |         |            |
| US | A1 | 13/450370 | 2012-04-18 |         |            |
| US | B2 | 13/451271 | 2012-04-19 | 8677587 | 2014-03-25 |
| US | B2 | 12/820571 | 2010-06-22 | 8494676 | 2013-07-23 |

|    |    |           |            |          |            |
|----|----|-----------|------------|----------|------------|
| US | B2 | 13/987921 | 2013-09-17 | 9045211  | 2015-06-02 |
| US | A1 | 14/108041 | 2013-12-16 |          |            |
| US | B2 | 14/135740 | 2013-12-20 | 10329863 | 2019-06-25 |
| US | B1 | 13/385044 | 2012-01-28 | 8286973  | 2012-10-16 |
| US | A1 | 13/817253 | 2012-02-10 |          |            |
| US | B2 | 14/000191 | 2012-02-17 | 9290268  | 2016-03-22 |
| US | B2 | 12/342583 | 2008-12-23 | 8382029  | 2013-02-26 |
| US | B1 | 13/385044 | 2012-01-28 | 8286973  | 2012-10-16 |
| US | A1 | 13/817253 | 2012-02-10 |          |            |
| US | B2 | 14/000191 | 2012-02-17 | 9290268  | 2016-03-22 |
| US | B2 | 13/632604 | 2012-10-01 | 9463393  | 2016-10-11 |
| US | B2 | 13/720773 | 2012-12-19 | 8960595  | 2015-02-24 |
| US | B2 | 14/383038 | 2013-03-07 | 9938368  | 2018-04-10 |
| US | A1 | 13/917615 | 2013-06-13 |          |            |
| US | B2 | 14/025728 | 2013-09-12 | 9035558  | 2015-05-19 |
| US | B2 | 14/759309 | 2014-02-19 | 9745057  | 2017-08-29 |
| US | B2 | 14/759321 | 2014-02-19 | 9745058  | 2017-08-29 |
| US | B1 | 14/268837 | 2014-05-02 | 9345240  | 2016-05-24 |
| US | B2 | 14/273527 | 2014-05-08 | 9763502  | 2017-09-19 |
| US | B1 | 14/320931 | 2014-07-01 | 9248892  | 2016-02-02 |
| US | B2 | 14/525010 | 2014-10-27 | 10526086 | 2020-01-07 |
| US | B2 | 14/729594 | 2015-06-03 | 10212926 | 2019-02-26 |
| US | B2 | 15/036813 | 2015-08-06 | 9938007  | 2018-04-10 |
| US | A1 | 14/836715 | 2015-08-26 |          |            |
| US | B2 | 14/866220 | 2015-09-25 | 9756846  | 2017-09-12 |
| US | B1 | 14/956453 | 2015-12-02 | 9616979  | 2017-04-11 |
| US | B2 | 15/543164 | 2015-12-04 | 10144893 | 2018-12-04 |
| US | B2 | 15/094602 | 2016-04-08 | 10960267 | 2021-03-30 |
| US | B2 | 15/138592 | 2016-04-26 | 9661842  | 2017-05-30 |
| US | B2 | 15/149167 | 2016-05-08 | 10422359 | 2019-09-24 |
| US | B2 | 15/755115 | 2016-05-27 | 10980605 | 2021-04-20 |
| US | B2 | 15/226563 | 2016-08-02 | 9775338  | 2017-10-03 |
| US | B2 | 15/761855 | 2016-09-21 | 10605962 | 2020-03-31 |
| US | A1 | 15/272030 | 2016-09-21 |          |            |
| US | B2 | 15/291870 | 2016-10-12 | 10308375 | 2019-06-04 |
| US | B2 | 15/291874 | 2016-10-12 | 10220963 | 2019-03-05 |
| US | B2 | 15/598630 | 2017-05-18 | 10477918 | 2019-11-19 |
| US | B2 | 15/610775 | 2017-06-01 | 10549361 | 2020-02-04 |
| US | B1 | 15/673335 | 2017-08-09 | 10212503 | 2019-02-19 |
| US | A1 | 15/678262 | 2017-08-16 |          |            |
| US | B1 | 15/866349 | 2018-01-09 | 10817052 | 2020-10-27 |
| US | B2 | 15/888004 | 2018-02-03 | 10920800 | 2021-02-16 |
| US | B2 | 15/942730 | 2018-04-02 | 10610370 | 2020-04-07 |
| US | B2 | 15/964752 | 2018-04-27 | 11136117 | 2021-10-05 |
| US | B2 | 15/969176 | 2018-05-02 | 11039823 | 2021-06-22 |
| US | A1 | 16/627929 | 2018-06-25 |          |            |
| US | B2 | 15/682033 | 2017-08-21 | 10195048 | 2019-02-05 |
| US | B2 | 16/190118 | 2018-11-13 | 11122820 | 2021-09-21 |
| US | A1 | 16/240234 | 2019-01-04 |          |            |
| US | B2 | 16/241398 | 2019-01-07 | 10924837 | 2021-02-16 |
| US | A1 | 16/257679 | 2019-01-25 |          |            |
| US | A1 | 16/266788 | 2019-02-04 |          |            |
| US | B2 | 16/362089 | 2019-03-22 | 10548311 | 2020-02-04 |
| US | B1 | 16/424762 | 2019-05-29 | 10569182 | 2020-02-25 |
| US | A1 | 16/432190 | 2019-06-05 |          |            |
| US | A1 | 16/452183 | 2019-06-25 |          |            |
| US | B2 | 16/531095 | 2019-08-04 | 10805732 | 2020-10-13 |
| US | B1 | 16/726071 | 2019-12-23 | 11142878 | 2021-10-12 |
| US | A1 | 16/734341 | 2020-01-05 |          |            |
| US | A1 | 16/780896 | 2020-02-03 |          |            |
| US | B2 | 16/822381 | 2020-03-18 | 11155326 | 2021-10-26 |
| US | B1 | 17/069868 | 2020-10-14 | 10935986 | 2021-03-02 |

|    |    |             |            |         |            |
|----|----|-------------|------------|---------|------------|
| US | A1 | 17/100666   | 2020-11-20 |         |            |
| US | A1 | 17/130152   | 2020-12-22 |         |            |
| US | A1 | 17/175642   | 2021-02-13 |         |            |
| JP | A  | 2002-134252 | 2002-05-09 |         |            |
| JP | A  | 2002-133850 | 2002-05-09 |         |            |
| JP | A  | 2007-552440 | 2005-07-07 |         |            |
| JP | A  | 2005-350639 | 2005-12-05 |         |            |
| JP | A  | 2003-559369 | 2002-12-20 |         |            |
| JP | A  | 2008-509279 | 2006-05-02 |         |            |
| JP | B2 | 2009-507796 | 2007-04-25 | 5538881 | 2014-05-09 |
| JP | A  | 2007-145415 | 2007-05-31 |         |            |
| JP | A  | 2007-145424 | 2007-05-31 |         |            |
| JP | A  | 2007-145430 | 2007-05-31 |         |            |
| JP | B2 | 2008-250098 | 2008-09-29 | 5120645 | 2012-11-02 |
| JP | B2 | 2008-254320 | 2008-09-30 | 5088580 | 2012-09-21 |
| JP | A  | 2009-026022 | 2009-02-06 |         |            |
| JP | A  | 2009-194436 | 2009-08-25 |         |            |
| JP | B2 | 2011-525252 | 2009-08-28 | 5607629 | 2014-09-05 |
| JP | A  | 2012-516515 | 2010-06-23 |         |            |
| JP | A  | 2012-094986 | 2012-04-18 |         |            |
| JP | B2 | 2013-197971 | 2013-09-25 | 6171788 | 2017-07-14 |
| JP | B2 | 2013-204011 | 2013-09-30 | 6171801 | 2017-07-14 |
| JP | B2 | 1988-058127 | 1988-03-11 | 2791031 | 1998-06-12 |
| JP | B2 | 1994-143713 | 1994-06-27 | 3243937 | 2001-10-26 |
| JP | B2 | 1994-202330 | 1994-08-26 | 3712276 | 2005-08-26 |
| JP | A  | 1995-087480 | 1995-03-20 |         |            |
| JP | A  | 1997-028126 | 1997-02-12 |         |            |
| JP | A  | 1998-087334 | 1998-03-31 |         |            |
| JP | A  | 1999-098973 | 1999-04-06 |         |            |
| JP | A  | 2000-620999 | 2000-05-26 |         |            |
| JP | A  | 2000-224117 | 2000-07-25 |         |            |
| JP | A  | 2001-184354 | 2001-06-19 |         |            |
| JP | A  | 2001-184356 | 2001-06-19 |         |            |
| JP | A  | 2002-134252 | 2002-05-09 |         |            |
| JP | A  | 2002-133850 | 2002-05-09 |         |            |
| JP | A  | 2003-559369 | 2002-12-20 |         |            |
| JP | A  | 2007-552440 | 2005-07-07 |         |            |
| JP | A  | 2005-350639 | 2005-12-05 |         |            |
| JP | A  | 2008-509279 | 2006-05-02 |         |            |
| JP | B2 | 2009-507796 | 2007-04-25 | 5538881 | 2014-05-09 |
| JP | A  | 2007-145415 | 2007-05-31 |         |            |
| JP | A  | 2007-145424 | 2007-05-31 |         |            |
| JP | A  | 2007-145430 | 2007-05-31 |         |            |
| JP | B2 | 2008-250098 | 2008-09-29 | 5120645 | 2012-11-02 |
| JP | B2 | 2008-254320 | 2008-09-30 | 5088580 | 2012-09-21 |
| JP | A  | 2009-026022 | 2009-02-06 |         |            |
| JP | A  | 2009-194436 | 2009-08-25 |         |            |
| JP | B2 | 2011-525252 | 2009-08-28 | 5607629 | 2014-09-05 |
| JP | A  | 2012-094986 | 2012-04-18 |         |            |
| JP | A  | 2012-516515 | 2010-06-23 |         |            |
| JP | B2 | 2013-264675 | 2013-12-20 | 5694497 | 2015-02-13 |
| JP | A  | 2014-102256 | 2014-05-16 |         |            |
| JP | B2 | 2015-526214 | 2014-06-05 | 6052641 | 2016-12-09 |
| JP | A  | 2015-162969 | 2015-08-20 |         |            |
| JP | A  | 2017-531543 | 2015-12-09 |         |            |
| JP | A  | 2017-550079 | 2015-12-09 |         |            |
| JP | A  | 2016-102733 | 2016-05-23 |         |            |
| JP | B2 | 2016-126496 | 2016-06-27 | 6636869 | 2019-12-27 |
| JP | B2 | 2018-528929 | 2016-08-22 | 6770576 | 2020-09-29 |
| JP | A  | 2017-060705 | 2017-03-27 |         |            |
| JP | A  | 2017-092111 | 2017-05-08 |         |            |
| JP | A  | 2020-535223 | 2017-12-31 |         |            |

|    |    |             |            |         |            |
|----|----|-------------|------------|---------|------------|
| JP | A  | 2020-500159 | 2018-06-25 |         |            |
| EP | B1 | 2006-123844 | 2002-06-14 | 1745763 | 2016-08-10 |
| EP | B1 | 2003-783595 | 2003-11-17 | 1684578 | 2013-01-23 |
| EP | B1 | 2005-826668 | 2005-12-07 | 1861178 | 2015-11-04 |
| EP | B1 | 2007-756046 | 2007-04-25 | 2010104 | 2018-09-05 |
| EP | B1 | 2007-120198 | 2007-11-07 | 2057971 | 2010-06-09 |
| EP | A2 | 2007-853144 | 2007-11-20 |         |            |
| EP | B1 | 2007-845710 | 2007-11-27 | 2216430 | 2013-01-09 |
| EP | B1 | 2008-841931 | 2008-10-26 | 2215330 | 2014-04-16 |
| EP | A1 | 2009-174760 | 2009-11-02 |         |            |
| EP | B1 | 2010-810832 | 2010-07-29 | 2468074 | 2020-04-22 |
| EP | A2 | 1985-301685 | 1985-03-12 |         |            |
| EP | B1 | 1986-902601 | 1986-03-26 | 0217917 | 1993-12-15 |
| EP | B1 | 1999-912528 | 1999-03-17 | 1161219 | 2009-01-14 |
| EP | B1 | 2006-123844 | 2002-06-14 | 1745763 | 2016-08-10 |
| EP | B1 | 2003-783595 | 2003-11-17 | 1684578 | 2013-01-23 |
| EP | B1 | 2005-826668 | 2005-12-07 | 1861178 | 2015-11-04 |
| EP | B1 | 2007-756046 | 2007-04-25 | 2010104 | 2018-09-05 |
| EP | B1 | 2007-120198 | 2007-11-07 | 2057971 | 2010-06-09 |
| EP | A2 | 2007-853144 | 2007-11-20 |         |            |
| EP | B1 | 2007-845710 | 2007-11-27 | 2216430 | 2013-01-09 |
| EP | B1 | 2008-841931 | 2008-10-26 | 2215330 | 2014-04-16 |
| EP | A1 | 2009-174760 | 2009-11-02 |         |            |
| EP | B1 | 2010-810832 | 2010-07-29 | 2468074 | 2020-04-22 |
| EP | B1 | 2014-754397 | 2014-02-19 | 2923944 | 2020-10-14 |
| EP | B1 | 2016-725012 | 2016-05-11 | 3304243 | 2019-04-10 |
| EP | A2 | 2017-869771 | 2017-08-21 |         |            |
| EP | A1 | 2017-818180 | 2017-12-22 |         |            |
| EP | A1 | 2018-828449 | 2018-06-25 |         |            |
| EP | A1 | 2018-749099 | 2018-07-24 |         |            |
| EP | A1 | 2019-803597 | 2019-05-16 |         |            |
